# Supplementary material
Source: publisher figshare collection journal article supplement (https://gsajournals.figshare.com/articles/dataset/_/11449542)
Supplement: Supplementary file 1 [file 2]

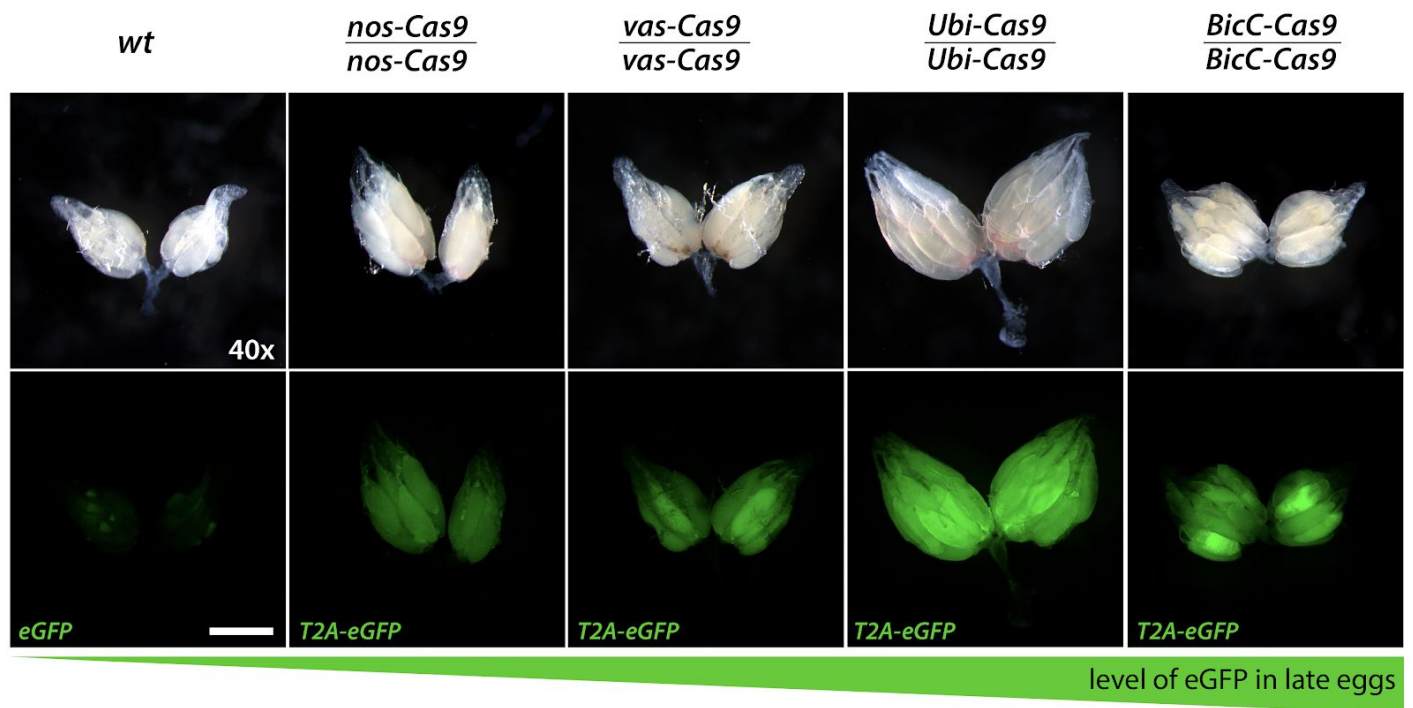

**Supplementary Figure S1. Genetics of the split-drive design and possible repair events.** Each element (Gene Drive and Cas9) is inactive on its own and can be maintained as a homozygous parental line (P). The cross between the homozygous lines results in 100% trans-heterozygous  $F_1$  progeny that carry both elements. gRNA<sup>w</sup> expressed by *GDe* in the germline and soma directs cleavage at *white* locus by Cas9, which can be repaired in three different ways: via HDR using  $w^{GDe}$  as a repair template and result in homing of *GDe*; and via Non-Homologous End Joining (NHEJ) and lead to *white* loss-of-function resistance ( $w^{R2}$ ) allele or an in-frame functional resistance ( $w^{R1}$ ) allele.

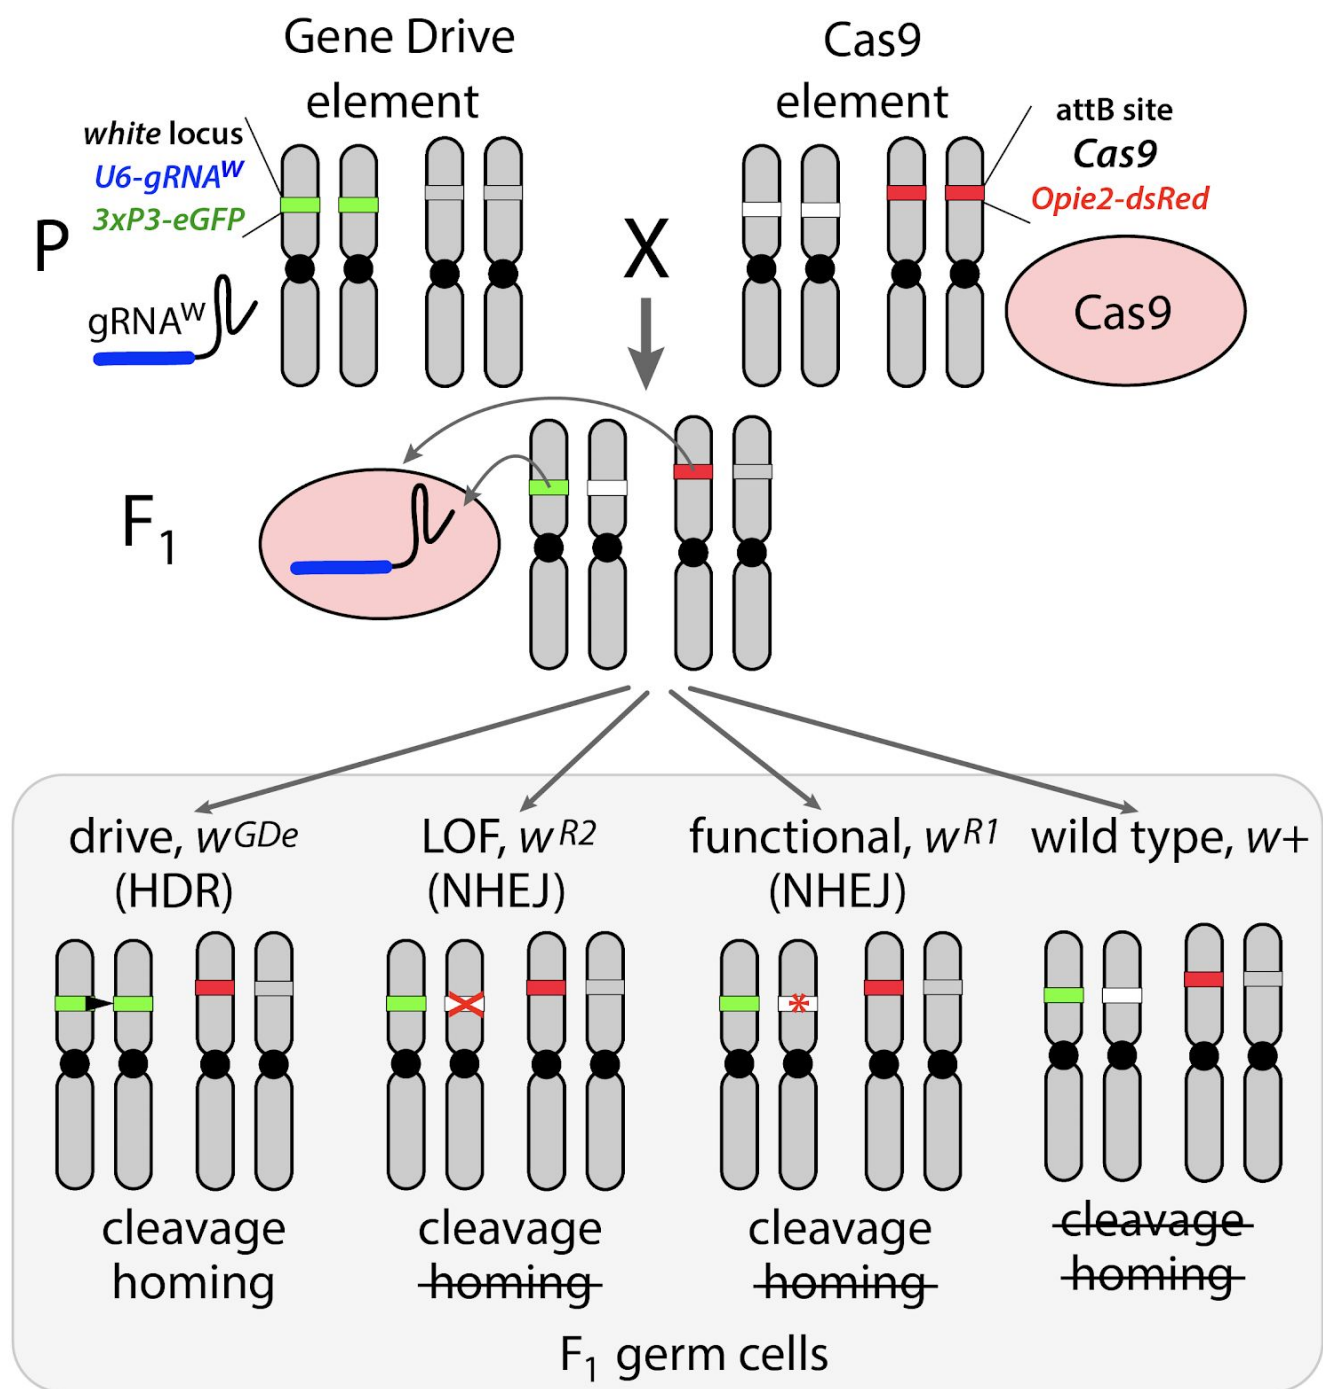

**Supplementary Figure S2. Fluorescent microscopy imaging of relative amount of maternally deposited Cas9-T2A-eGFP protein in four homozygous lines expressing *Cas9* under different promoters.** *Nanos* (*nos-Cas9*), *vasa* (*vas-Cas9*), *Ubiquitin-63E* (*Ubi-Cas9*), and *Bicaudal C* (*BicC-Cas9*) constructs (Figure 1A) were inserted at the same site on the 3rd chromosome using  $\phi$ C31-mediated integration. A self-cleaving T2A-eGFP sequence, which was attached to the 3'-end of *Cas9* coding sequence, provided an indicator of *Cas9* expression. Expression levels of eGFP in ovaries of a homozygous female from each *Cas9* line were compared to that in wild type (*wt*) ovaries. Both *nos-Cas9* and *vas-Cas9* supported weak maternal deposition, while *Ubi-Cas9* and especially *BicC-Cas9* resulted in strong maternal deposition in developing eggs. Out of four tested *Cas9* promoters, *nanos* and *Bicaudal C* supported the weakest and the strongest, respectively, maternal deposition into developing late eggs. Scale bars correspond to 500  $\mu$ m.

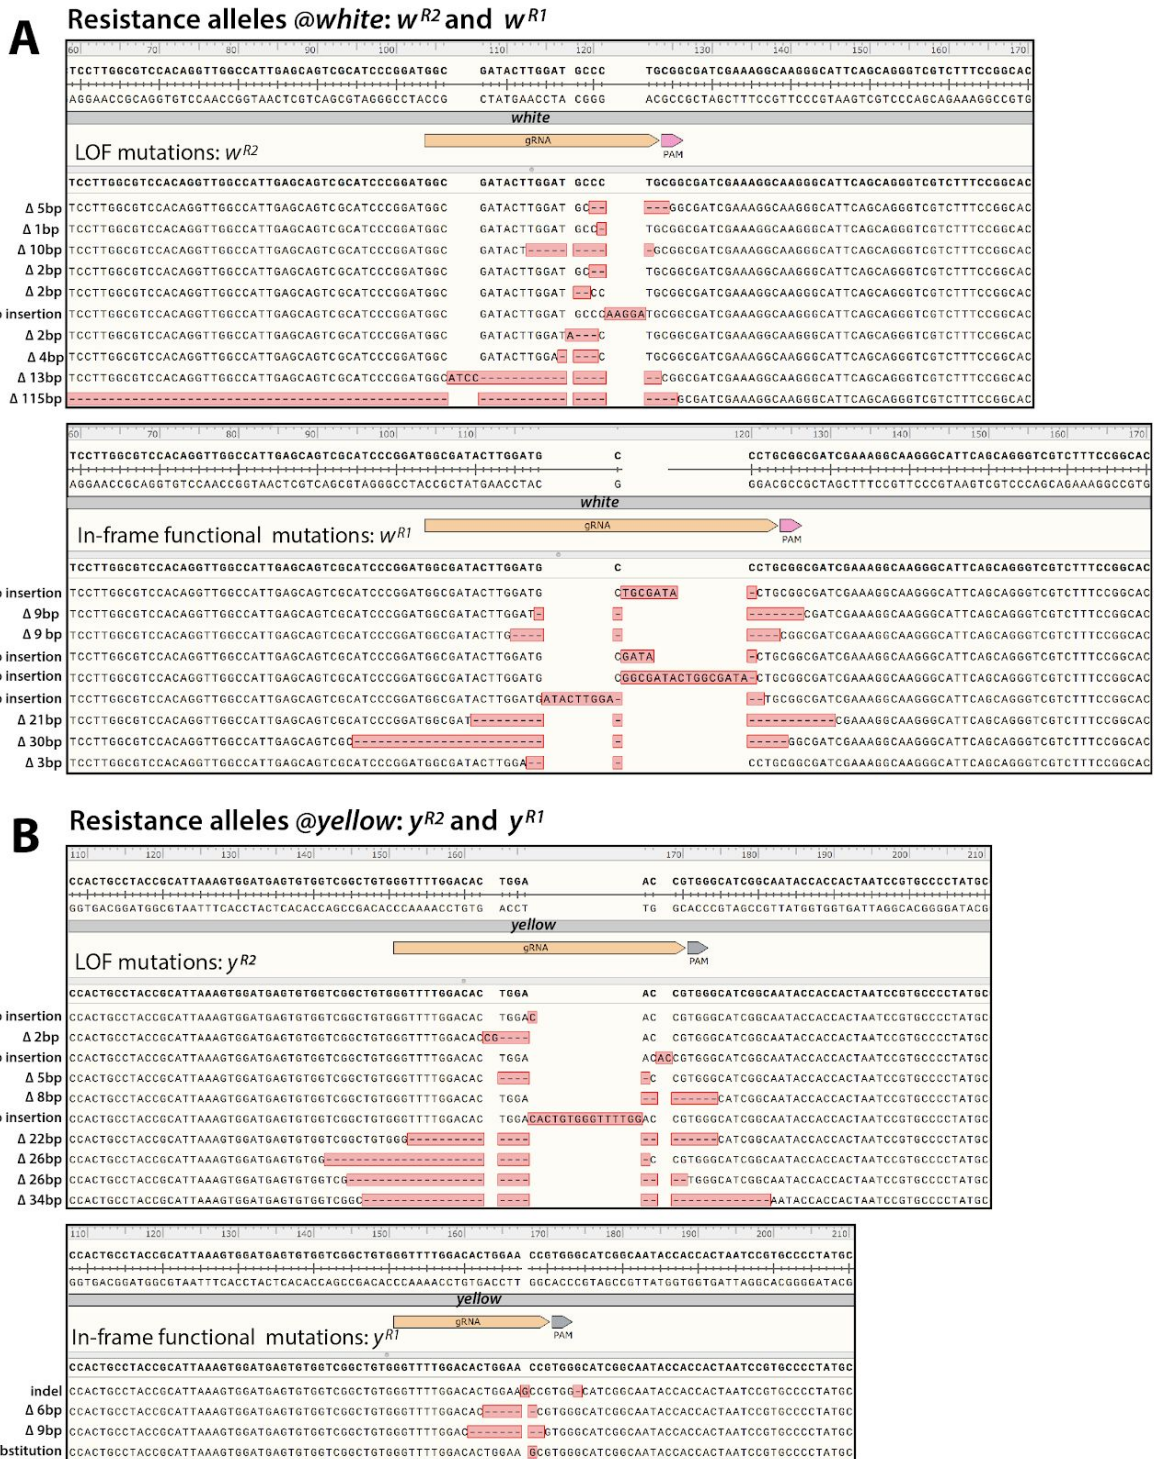

**Supplementary Figure S3. Examples of *white* and *yellow* resistance alleles generated by Cas9/gRNA-mediated DNA cleavage.** Not every DSB induced by Cas9/gRNA in germ cells is repaired by HDR resulting in homing. NHEJ pathway also ligates DSBs and can lead to base insertions or deletions (*indels*) incorporated at the ligated DSBs. These *indels* change recognition sequence for gRNA and can result in mutations that are resistant to further cleavages by the same Cas9/gRNA system. We identified both types of resistance alleles – loss-of-function (LOF) ( $R2$ ) and in-frame functional ( $R1$ ) mutations – generated at both *white* and *yellow* loci. Diversities of  $w^{R2}$  and  $w^{R1}$  (A), and  $y^{R2}$  and  $y^{R1}$  (B) found at *white* and *yellow* loci, respectively. Homozygous LOF mutations of both *white* and *yellow* genes are viable and fertile in *Drosophila*, and thus frequencies of resistance alleles increased between  $F_2$  and  $F_3$  generations (Figure 3B).
